# Supplementary material for: A robust dual-readout ratiometric assay for dopamine based on NiMn2O4-catalyzed DHNP fluorophore conversion
Source: Royal Society of Chemistry journal article supplement (doi:10.1039/d6ra00996d), 2026-04-28
Supplement: d6ra00996d1.pdf [file d6ra00996d1.pdf]

## **Electronic Supplementary Material**

### **A robust dual-readout ratiometric assay for dopamine based on NiMn<sub>2</sub>O<sub>4</sub>-catalyzed DHNP fluorophore conversion**

**Glowi Alasiri<sup>a</sup>, Ali M. Alaseem<sup>b</sup>, Razan Orfali<sup>b</sup>, Ramadan Ali<sup>c</sup>, Al-Montaser Bellah H. Ali<sup>d</sup>,**

**Mohamed M. El-Wakil<sup>e\*</sup>**

<sup>a</sup> Department of Biochemistry, College of Medicine, Imam Mohammad Ibn Saud Islamic University (IMSIU), Riyadh, 13317, Saudi Arabia.

<sup>b</sup> Department of pharmacology College of Medicine, Imam Mohammad Ibn Saud Islamic University (IMSIU), Riyadh 13317, Saudi Arabia

<sup>c</sup> Department of Pharmaceutical Chemistry, Faculty of Pharmacy, University of Tabuk, Tabuk 71491, Saudi Arabia

<sup>d</sup> Department of Pharmaceutical Analytical Chemistry, Faculty of Pharmacy, Assiut University, Assiut, 71526, Egypt

<sup>e</sup> Pharmaceutical Chemistry Department, Faculty of Pharmacy, Badr University in Assiut (BUA), 2014101, Assiut, Egypt

#### **Correspondence**

\* [mohamed.elwakeel@pharm.aun.edu.eg](mailto:mohamed.elwakeel@pharm.aun.edu.eg), [mohamed.mohamoud@ymail.com](mailto:mohamed.mohamoud@ymail.com)

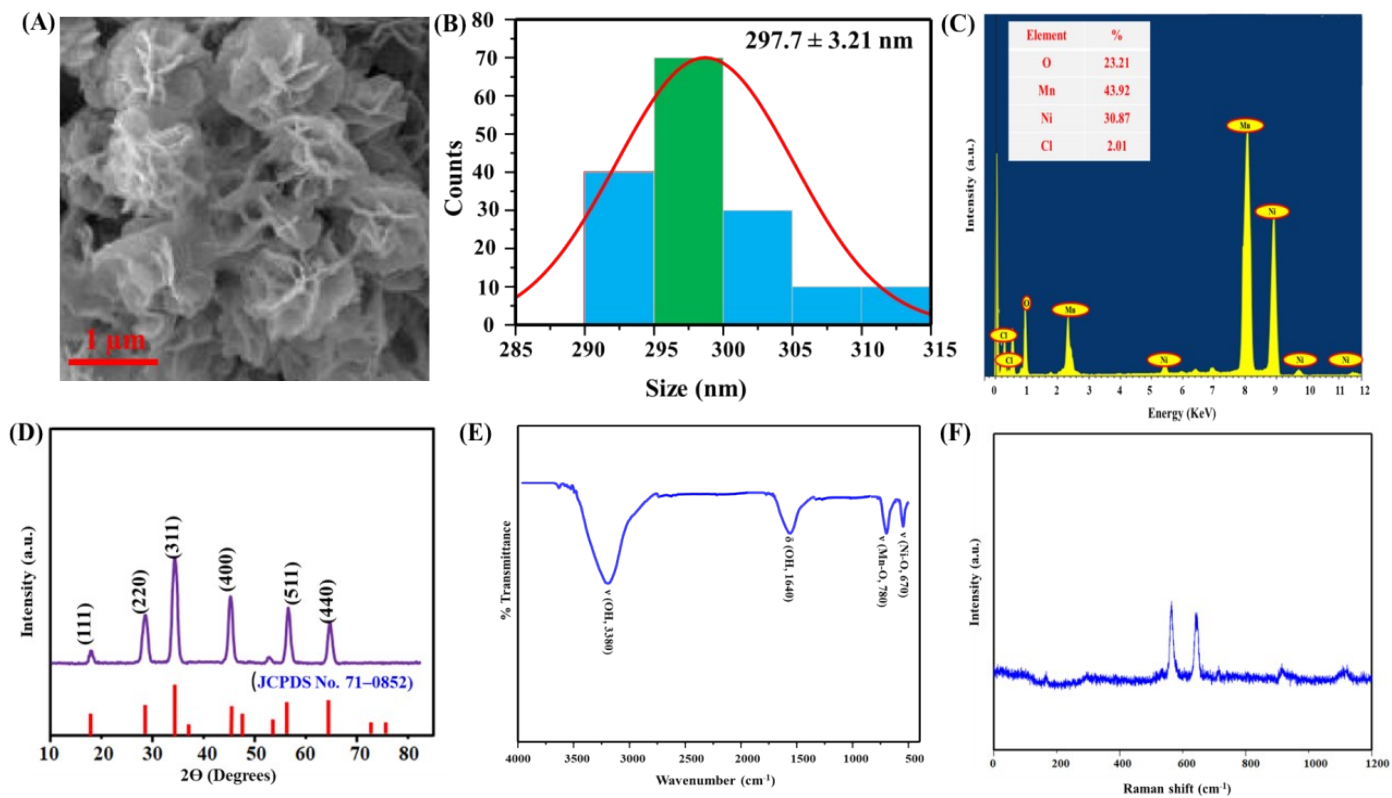

**Fig. S1** SEM (A), size distribution (B), EDX (C), XRD (D), FTIR (E), and Raman spectrum of NiMn<sub>2</sub>O<sub>4</sub> nanozyme.

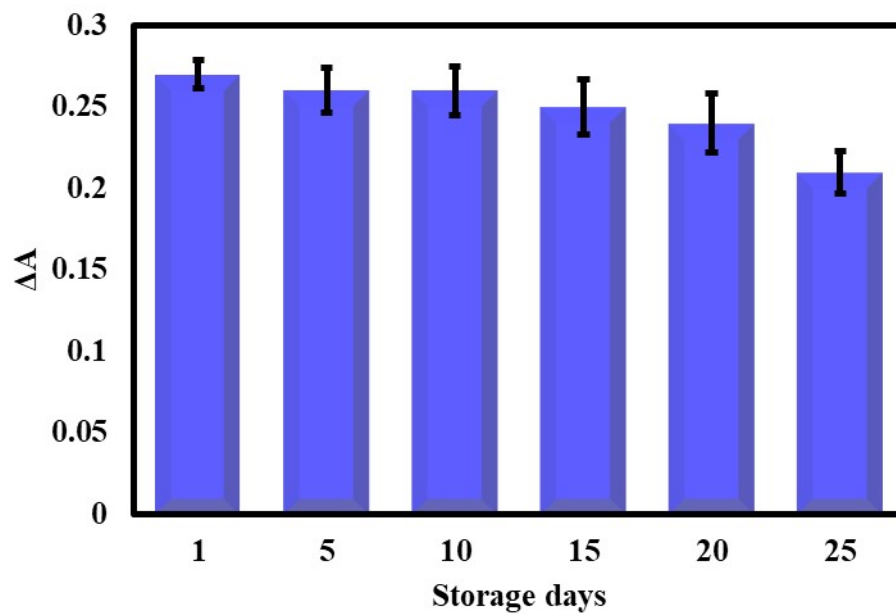

**Fig. S2.** Long-term stability of the nanozyme, evaluated by its colorimetric response toward 40  $\mu\text{M}$  DA over 25 days. All measurements were performed in triplicate.

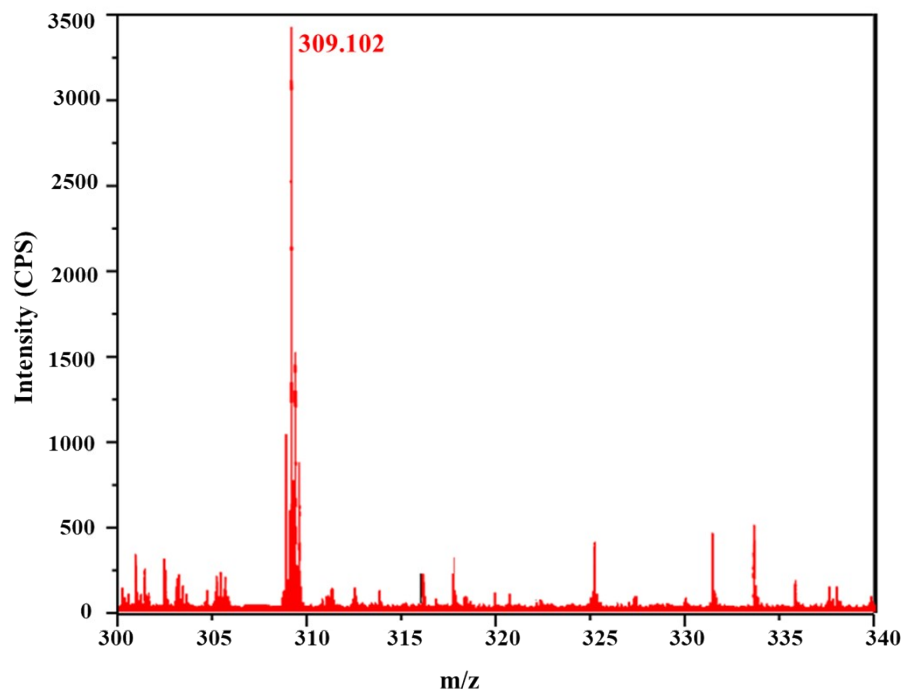

**Fig. S3** LC-MS/MS analysis of the cyclization reaction between DA and DHNP.

**Table S1.** Michaelis-Menten kinetic parameters of NiMn<sub>2</sub>O<sub>4</sub> in comparison with various reported nanozyme systems.

| Enzyme                                               | $K_m$ (mM) |                               | $V_{max}$ ( $10^{-8}$ M s <sup>-1</sup> ) |                               | Reference        |
|------------------------------------------------------|------------|-------------------------------|-------------------------------------------|-------------------------------|------------------|
|                                                      | TMB        | H <sub>2</sub> O <sub>2</sub> | TMB                                       | H <sub>2</sub> O <sub>2</sub> |                  |
| HRP                                                  | 0.434      | 3.702                         | 10.000                                    | 8.710                         | [1]              |
| NH <sub>2</sub> -MIL-88(Fe)                          | 0.219      | 0.029                         | 4.104                                     | 2.519                         | [2]              |
| Ag/Fe <sub>3</sub> O <sub>4</sub> @h-BN              | 0.162      | 0.494                         | 7.21                                      | 10.25                         | [3]              |
| FeOOH                                                | 2.81       | 3.85                          | 0.54                                      | 0.33                          | [4]              |
| Fe-CDs                                               | 0.0086     | 0.00672                       | 2.035                                     | 2.817                         | [5]              |
| BSA@Pt NPs                                           | 0.17       | 104                           | 23.0                                      | 24.1                          | [6]              |
| Co <sub>3</sub> O <sub>4</sub>                       | 0.511      | 140.56                        | 12.41                                     | 3.43                          | [7]              |
| CeO <sub>2</sub> /Co <sub>3</sub> O <sub>4</sub> HNs | 0.495      | 1.225                         | 27.06                                     | 8.87                          | [8]              |
| Au-NCs                                               | 3.59       | 16.71                         | 0.86                                      | 1.3                           | [9]              |
| AuPtCo                                               | 0.137      | 2.593                         | 1.79                                      | 10.16                         | [10]             |
| PDA@Cu-CeO <sub>2</sub>                              | 0.197      | 0.196                         | 77,0000                                   | 128,0000                      | [11]             |
| CeO <sub>2</sub> NSs                                 | 8.17       | 4.33                          | 3400                                      | 1450                          | [12]             |
| NiMn <sub>2</sub> O <sub>4</sub>                     | 0.119      | 1.671                         | 19.621                                    | 21.750                        | <b>This work</b> |

**Table S 2** Precision DA detection in buffer solution by fluorescence method.

| Added ( $\mu\text{M}$ ) | Intra-batch (n = 6)        |            |       | Inter-batch (n = 6 * 3)    |            |       |
|-------------------------|----------------------------|------------|-------|----------------------------|------------|-------|
|                         | Measured ( $\mu\text{M}$ ) | Recovery % | RSD % | Measured ( $\mu\text{M}$ ) | Recovery % | RSD % |
| 5.0                     | 4.92 $\pm$ 0.17            | 98.4       | 1.76  | 5.13 $\pm$ 0.43            | 102.6      | 2.76  |
| 50.0                    | 48.87 $\pm$ 0.43           | 97.7       | 1.88  | 51.31 $\pm$ 0.65           | 102.6      | 3.19  |
| 100.0                   | 101.32 $\pm$ 0.65          | 101.3      | 2.55  | 102.67 $\pm$ 0.87          | 102.7      | 2.56  |

**Table S3** Precision DA detection in buffer solution by colorimetric method.

| Added ( $\mu\text{M}$ ) | Intra-batch (n = 6)        |            |       | Inter-batch (n = 6 * 3)    |            |       |
|-------------------------|----------------------------|------------|-------|----------------------------|------------|-------|
|                         | Measured ( $\mu\text{M}$ ) | Recovery % | RSD % | Measured ( $\mu\text{M}$ ) | Recovery % | RSD % |
| 5.0                     | 4.98 $\pm$ 0.14            | 99.6       | 2.67  | 5.24 $\pm$ 0.22            | 104.8      | 3.62  |
| 50.0                    | 52.43 $\pm$ 0.24           | 104.9      | 2.15  | 47.63 $\pm$ 0.32           | 95.3       | 2.89  |
| 100.0                   | 97.67 $\pm$ 0.37           | 97.7       | 3.10  | 104.21 $\pm$ 0.57          | 104.2      | 3.87  |

**Table S4** Precision DA detection in human serum by fluorometric method.

| Added ( $\mu\text{M}$ ) | Intra-batch (n = 6)        |            |       | Inter-batch (n = 6 * 3)    |            |       |
|-------------------------|----------------------------|------------|-------|----------------------------|------------|-------|
|                         | Measured ( $\mu\text{M}$ ) | Recovery % | RSD % | Measured ( $\mu\text{M}$ ) | Recovery % | RSD % |
| 5.0                     | 5.35 $\pm$ 0.36            | 107.0      | 3.76  | 4.75 $\pm$ 0.54            | 95.0       | 3.10  |
| 50.0                    | 47.76 $\pm$ 0.57           | 95.8       | 4.18  | 53.47 $\pm$ 0.47           | 106.9      | 4.26  |
| 100.0                   | 96.34 $\pm$ 0.87           | 96.3       | 4.46  | 95.78 $\pm$ 0.82           | 95.8       | 3.01  |

**Table S5** Precision DA detection in human serum by colorimetric method.

| Added ( $\mu\text{M}$ ) | Intra-batch (n = 6)        |            |       | Inter-batch (n = 6 * 3)    |            |       |
|-------------------------|----------------------------|------------|-------|----------------------------|------------|-------|
|                         | Measured ( $\mu\text{M}$ ) | Recovery % | RSD % | Measured ( $\mu\text{M}$ ) | Recovery % | RSD % |
| 5.0                     | 4.87 $\pm$ 0.54            | 97.4       | 3.87  | 5.24 $\pm$ 0.76            | 104.8      | 2.87  |
| 50.0                    | 53.21 $\pm$ 0.76           | 106.4      | 3.26  | 53.89 $\pm$ 0.44           | 106.9      | 3.66  |
| 100.0                   | 103.76 $\pm$ 0.65          | 103.8      | 4.00  | 106.32 $\pm$ 0.76          | 106.3      | 4.34  |

**Table S6** Precision DA detection in human urine by fluorometric method.

| Added ( $\mu\text{M}$ ) | Intra-batch (n = 6)        |            |       | Inter-batch (n = 6 * 3)    |            |       |
|-------------------------|----------------------------|------------|-------|----------------------------|------------|-------|
|                         | Measured ( $\mu\text{M}$ ) | Recovery % | RSD % | Measured ( $\mu\text{M}$ ) | Recovery % | RSD % |
| 5.0                     | 5.26 $\pm$ 0.44            | 105.2      | 3.00  | 4.78 $\pm$ 0.43            | 95.6       | 2.98  |
| 50.0                    | 52.25 $\pm$ 0.54           | 104.5      | 3.23  | 52.43 $\pm$ 0.65           | 104.8      | 3.10  |
| 100.0                   | 102.14 $\pm$ 0.55          | 102.1      | 3.87  | 104.21 $\pm$ 0.57          | 104.2      | 2.76  |

**Table S7** Precision DA detection in human urine by colorimetric method.

| Added ( $\mu\text{M}$ ) | Intra-batch (n = 6)        |            |       | Inter-batch (n = 6 * 3)    |            |       |
|-------------------------|----------------------------|------------|-------|----------------------------|------------|-------|
|                         | Measured ( $\mu\text{M}$ ) | Recovery % | RSD % | Measured ( $\mu\text{M}$ ) | Recovery % | RSD % |
| 5.0                     | 4.89 $\pm$ 0.43            | 97.8       | 2.78  | 4.88 $\pm$ 0.43            | 97.6       | 3.10  |
| 50.0                    | 47.43 $\pm$ 0.35           | 94.9       | 1.87  | 52.03 $\pm$ 0.65           | 104.1      | 1.89  |
| 100.0                   | 97.43 $\pm$ 0.67           | 97.4       | 2.10  | 103.28 $\pm$ 0.57          | 103.3      | 2.21  |
